# Supplementary material for: Camera-LiDAR Cross-Modality Fusion Water Segmentation for Unmanned Surface Vehicles
Source: MDPI journal article supplement (doi:10.3390/jmse10060744), 2022-05-28
Supplement: s1 [file s1]

Article

# Camera-LiDAR Cross-Modality Fusion Water Segmentation for Unmanned Surface Vehicles

Jiantao Gao , Jingting Zhang, Chang Liu, Xiaomao Li \* and Yan Peng

Research Institute of USV Engineering, School of Mechatronic Engineering and Automation, Shanghai University, Shanghai 200444, China; summersunday@shu.edu.cn (J.G.); zjt322@shu.edu.cn (J.Z.); liuchang123@shu.edu.cn (C.L.); pengyan@shu.edu.cn (Y.P.)

\* Correspondence: lixiaomaosia@163.com

## Supplementary Materials:

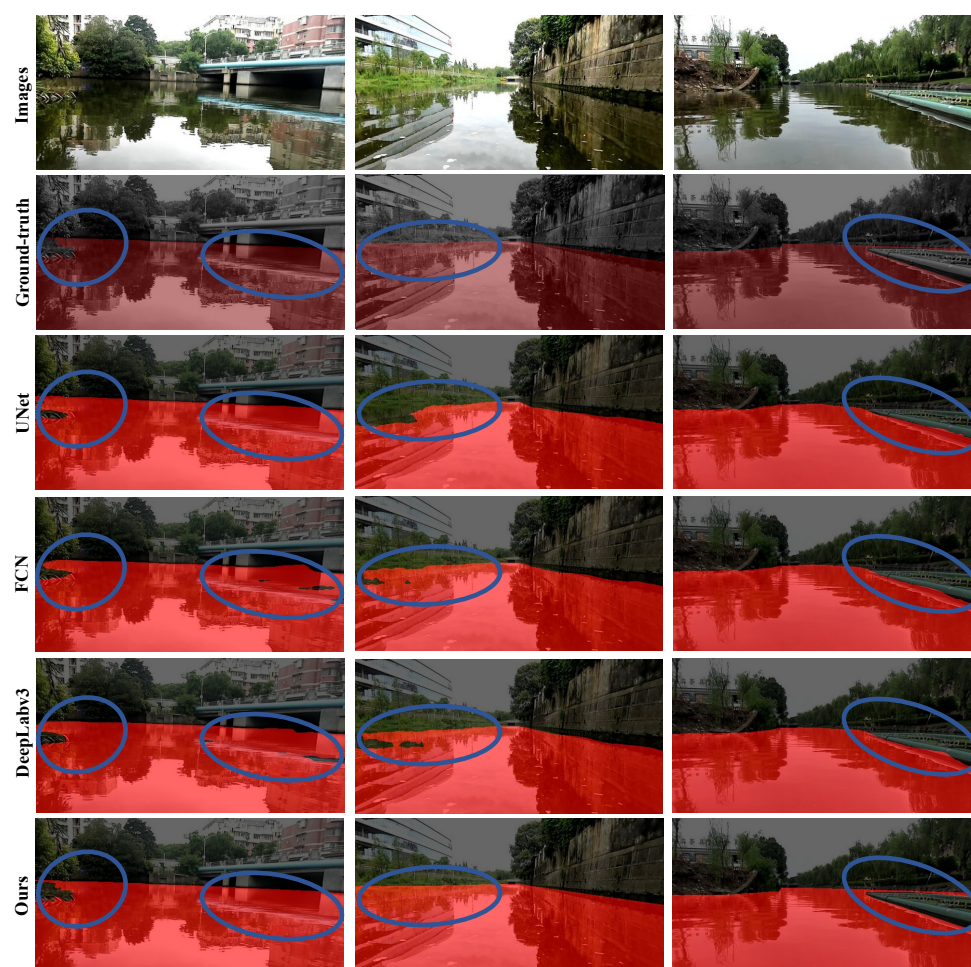

**Figure S1.** More qualitative results of our methods and those image-only-based methods.

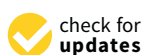

**Citation:** Gao, J.; Zhang, J.; Liu, C.; Li, X.; Peng, Y. Camera-LiDAR Cross-Modality Fusion Water Segmentation for Unmanned Surface Vehicles. *J. Mar. Sci. Eng.* **2022**, *1*, 744. <https://doi.org/10.3390/jmse10060744>

Academic Editor: Mai The Vu, Hyeung-Sik Choi

Received: 2 May 2022

Accepted: 26 May 2022

Published: 28 May 2022

**Publisher's Note:** MDPI stays neutral with regard to jurisdictional claims in published maps and institutional affiliations.

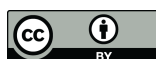

**Copyright:** © 2022 by the authors. Licensee MDPI, Basel, Switzerland. This article is an open access article distributed under the terms and conditions of the Creative Commons Attribution (CC BY) license (<https://creativecommons.org/licenses/by/4.0/>).

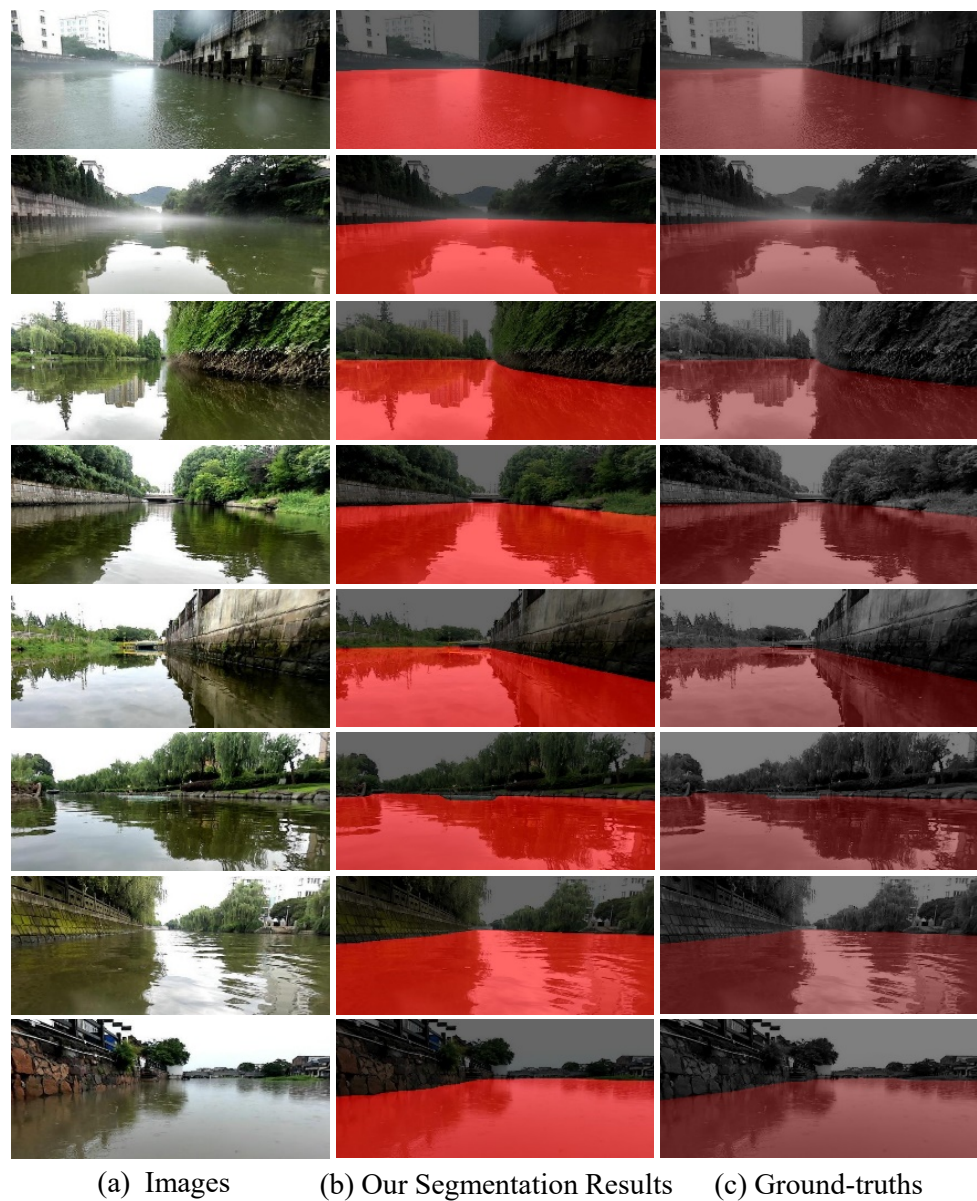

**Figure S2.** More qualitative results of our methods.
